# Supplementary material for: Individualized Management of Postoperative Radiotherapy for Patients with Diffuse Low-Grade Gliomas
Source: Preprints.org preprint supplement (doi:10.20944/preprints202408.1011.v1), 2024-08-14
Supplement: Supplementary file 1 [file supplementary]

1、 Cochrane Library :1785

Mesh Terms: glioma\*; astrocytoma\*; oligodendroglioma\*; oligoastrocytoma\*; ganglioglioma\*; xanthoastrocytoma\*; astroblastoma\*

Free word : Gliomas, Mixed; Mixed Gliomas; Mixed Glioma; Glioma, Mixed; Glial Cell Tumors; Tumor, Glial

Cell; Tumors, Glial Cell; Gliomas; Glial Cell Tumor; Gliomas, Malignant; Malignant Glioma; Glioma, Malignant;

Malignant Gliomas

(Gliomas, Mixed):ti,ab,kw or (Mixed Gliomas):ti,ab,kw or (Mixed Glioma):ti,ab,kw or (Glioma, Mixed):ti,ab,kw or

(Glial Cell Tumors):ti,ab,kw or (Tumor, Glial Cell):ti,ab,kw or (Tumors, Glial Cell):ti,ab,kw or (Gliomas):ti,ab,kw

or (Glial Cell Tumor):ti,ab,kw or (Gliomas, Malignant):ti,ab,kw or (Malignant Glioma):ti,ab,kw or (Glioma,

Malignant):ti,ab,kw or (Malignant Gliomas):ti,ab,kw

Mesh Terms: Radiotherapy

Free word : Radiation Treatments; Radiotherapies; Radiation Therapy; Therapy, Radiation; Treatment,

Radiation; Radiation Treatment; Radiation Therapies; Therapies, Radiation; Targeted Radiotherapy;

Radiotherapies, Targeted; Therapy, Targeted Radiation; Therapies, Targeted Radiation; Radiation Therapies,

Targeted; Targeted Radiotherapies; Targeted Radiation Therapy; Targeted Radiation Therapies; Radiotherapy,

Targeted; Radiation Therapy, Targeted

(Radiation Treatments):ti,ab,kw or (Radiotherapies):ti,ab,kw or (Radiation Therapy):ti,ab,kw or (Therapy,

Radiation):ti,ab,kw or (Treatment, Radiation):ti,ab,kw or (Radiation Treatment):ti,ab,kw or (Radiation

Therapies):ti,ab,kw or (Therapies, Radiation):ti,ab,kw or (Targeted Radiotherapy):ti,ab,kw or (Radiotherapies,

Targeted):ti,ab,kw or (Therapy, Targeted Radiation):ti,ab,kw or (Therapies, Targeted Radiation):ti,ab,kw or

(Radiation Therapies, Targeted):ti,ab,kw or (Targeted Radiotherapies):ti,ab,kw or (Targeted Radiation

Therapy):ti,ab,kw or (Targeted Radiation Therapies):ti,ab,kw or (Radiotherapy, Targeted):ti,ab,kw or (Radiation

Therapy, Targeted):ti,ab,kw

Search Name: DLGG\_Meta

Date Run: 29/03/2024 20:56:27

Comment:

ID Search Hits

#1 MeSH descriptor: [Glioma] explode all trees 2054

#2 (Gliomas, Mixed):ti,ab,kw or (Mixed Gliomas):ti,ab,kw or (Mixed Glioma):ti,ab,kw or (Glioma, Mixed):ti,ab,kw  
or (Glial Cell Tumors):ti,ab,kw or (Tumor, Glial Cell):ti,ab,kw or (Tumors, Glial Cell):ti,ab,kw or (Gliomas):ti,ab,kw or  
(Glial Cell Tumor):ti,ab,kw or (Gliomas, Malignant):ti,ab,kw or (Malignant Glioma):ti,ab,kw or (Glioma, Malignant):ti,ab,kw or (Malignant Gliomas):ti,ab,kw 1315  
#3 MeSH descriptor: [Astrocytoma] explode all trees 1198  
#4 MeSH descriptor: [Oligodendroglioma] explode all trees 85  
#5 MeSH descriptor: [Ganglioglioma] explode all trees 0  
#6 glioma\* or astrocytoma\* or oligodendroglioma\* or oligoastrocytoma\* or ganglioglioma\* or xanthoastrocytoma\* or astroblastoma\* 2566  
#7 #1 or #2 or #3 or #4 or #5 or #6 3467  
#8 MeSH descriptor: [Radiotherapy] explode all trees 9984  
#9 (Radiation Treatments):ti,ab,kw or (Radiotherapies):ti,ab,kw or (Radiation Therapy):ti,ab,kw or (Therapy, Radiation):ti,ab,kw or (Treatment, Radiation):ti,ab,kw or (Radiation Treatment):ti,ab,kw or (Radiation Therapies):ti,ab,kw or (Therapies, Radiation):ti,ab,kw or (Targeted Radiotherapy):ti,ab,kw or (Radiotherapies, Targeted):ti,ab,kw or (Therapy, Targeted Radiation):ti,ab,kw or (Therapies, Targeted Radiation):ti,ab,kw or (Radiation Therapies, Targeted):ti,ab,kw or (Targeted Radiotherapies):ti,ab,kw or (Targeted Radiation Therapy):ti,ab,kw or (Targeted Radiation Therapies):ti,ab,kw or (Radiotherapy, Targeted):ti,ab,kw or (Radiation Therapy, Targeted):ti,ab,kw 29188  
#10 radiotherap\* or radiosurg\* 43068  
#11 radiation or irradiation 43271  
#12 MeSH descriptor: [] explode all trees and with qualifier(s): [radiotherapy - RT] 12303  
#13 #8 or #9 or #10 or #11 or #12 64548  
#14 #7 and #13 1847

2、Ovid Medline: 3852

Mesh Terms: Glioma

Free word: Gliomas, Malignant; Malignant Gliomas; Glioma, Malignant; Malignant Glioma; Tumor, Glial Cell;

Glial Cell Tumor; Gliomas; Glial Cell Tumors; Tumors, Glial Cell; Mixed Glioma; Gliomas, Mixed; Mixed Gliomas;

Glioma, Mixed

(Gliomas, Malignant or Malignant Gliomas or Glioma, Malignant or Malignant Glioma or Tumor, Glial Cell or Glial

Cell Tumor or Gliomas or Glial Cell Tumors or Tumors, Glial Cell or Mixed Glioma or Gliomas, Mixed or Mixed

Gliomas or Glioma, Mixed).ti,ab,kw.

glioma\*; astrocytoma\*; oligodendroglioma\*; oligoastrocytoma\*; ganglioglioma\*;  
xanthoastrocytoma\*;  
astroblastoma\*

Mesh Terms: Radiotherapy

Free word: Radiation Treatments; Radiotherapies; Radiation Therapy; Therapy, Radiation;  
Treatment,

Radiation; Radiation Treatment; Radiation Therapies; Therapies, Radiation; Targeted  
Radiotherapy;

Radiotherapies, Targeted; Therapy, Targeted Radiation; Therapies, Targeted Radiation; Radiation  
Therapies,

Targeted; Targeted Radiotherapies; Targeted Radiation Therapy; Targeted Radiation Therapies;  
Radiotherapy,

Targeted; Radiation Therapy, Targeted

(Radiation Treatments or Radiotherapies or Radiation Therapy or Therapy, Radiation or  
Treatment, Radiation or

Radiation Treatment or Radiation Therapies or Therapies, Radiation or Targeted Radiotherapy or  
Radiotherapies, Targeted or Therapy, Targeted Radiation or Therapies, Targeted Radiation or  
Radiation

Therapies, Targeted or Targeted Radiotherapies or Targeted Radiation Therapy or Targeted  
Radiation

Therapies or Radiotherapy, Targeted or Radiation Therapy, Targeted).ti,ab,kw.

exp Radiotherapy/

(radiotherap\* or radiosurg\*).mp.

radiation.mp.

irradiation.mp.

radiotherapy.fx.

sh: MeSH Subject Heading

hw: Subject Heading

fx: Floating Sub-Heading Word

Ovid MEDLINE(R) ALL <1946 to April 1, 2024>

1 exp Glioma/ 101310

2 glioma\*.mp. 82976

3 (Gliomas, Malignant or Malignant Gliomas or Glioma, Malignant or Malignant Glioma or Tumor,  
Glial Cell or

Glial Cell Tumor or Gliomas or Glial Cell Tumors or Tumors, Glial Cell or Mixed Glioma or Gliomas,  
Mixed or Mixed

Gliomas or Glioma, Mixed).ti,ab,kw. 36068

4 astrocytoma\*.mp. 24511

5 oligodendroglioma\*.mp. 6354

6 oligoastrocytoma\*.mp. 939

7 ganglioglioma\*.mp. 1874

8 xanthoastrocytoma\*.mp. 692

9 astroblastoma\*.mp. 229  
 10 or/1-9 129840  
 11 exp Radiotherapy/ 210666  
 12 (Radiation Treatments or Radiotherapies or Radiation Therapy or Therapy, Radiation or Treatment, Radiation or Radiation Treatment or Radiation Therapies or Therapies, Radiation or Targeted Radiotherapy or Radiotherapies, Targeted or Therapy, Targeted Radiation or Therapies, Targeted Radiation or Radiation Therapies, Targeted or Targeted Radiotherapies or Targeted Radiation Therapy or Targeted Radiation Therapies or Radiotherapy, Targeted or Radiation Therapy, Targeted).ti,ab,kw. 104824  
 13 (radiotherap\* or radiosurg\*).mp. [mp=title, book title, abstract, original title, name of substance word, subject heading word, floating sub-heading word, keyword heading word, organism supplementary concept word, protocol supplementary concept word, rare disease supplementary concept word, unique identifier, synonyms, population supplementary concept word, anatomy supplementary concept word] 398282  
 14 (radiation or irradiation).mp. [mp=title, book title, abstract, original title, name of substance word, subject heading word, floating sub-heading word, keyword heading word, organism supplementary concept word, protocol supplementary concept word, rare disease supplementary concept word, unique identifier, synonyms, population supplementary concept word, anatomy supplementary concept word] 813064  
 15 radiotherapy.fx. 214076  
 16 or/11-15 1025572  
 17 exp randomized controlled trial/ 611793  
 18 randomized controlled trial.pt. 610242  
 19 controlled clinical trial.pt. 95519  
 20 randomized.ti,ab. 696683  
 21 placebo.ti,ab. 253648  
 22 randomly.ti,ab. 431060  
 23 trial.ti,ab. 799735  
 24 groups.ti,ab. 2684892  
 25 drug therapy.hw. 208109  
 26 or/17-25 4039208  
 27 exp animals/ not humans.sh. 5207360  
 28 26 not 27 3509639  
 29 10 and 16 and 28 3852

3、Embase: 5083

Mesh: Glioma

Free word : ‘ Gliomas, Malignant ’ :ab,ti or ‘ Malignant Gliomas ’ :ab,ti or ‘ Glioma, Malignant ’ :ab,ti or ‘ Malignant

Glioma ’ :ab,ti or ‘ Tumor, Glial Cell ’ :ab,ti or ‘ Glial Cell Tumor ’ :ab,ti or ‘ Gliomas ’ :ab,ti or ‘ Glial Cell Tumors ’ :ab,ti or

‘ Tumors, Glial Cell ’ :ab,ti or ‘ Mixed Glioma ’ :ab,ti or ‘ Gliomas, Mixed ’ :ab,ti or ‘ Mixed Gliomas ’ :ab,ti or ‘ Glioma, Mixed ’

glioma\*; astrocytoma\*; oligodendroglioma\*; oligoastrocytoma\*

Mesh: radiotherapy

Free word: ‘ Radiation Treatments ’ :ab,ti or ‘ Radiotherapies ’ :ab,ti or ‘ Radiation Therapy ’ :ab,ti or ‘ Therapy,

Radiation ’ :ab,ti or ‘ Treatment, Radiation ’ :ab,ti or ‘ Radiation Treatment ’ :ab,ti or ‘ Radiation Therapies ’ :ab,ti or

‘ Therapies, Radiation ’ :ab,ti or ‘ Targeted Radiotherapy ’ :ab,ti or ‘ Radiotherapies, Targeted ’ :ab,ti or ‘ Therapy,

Targeted Radiation ’ :ab,ti or ‘ Therapies, Targeted Radiation ’ :ab,ti or ‘ Radiation Therapies, Targeted ’ :ab,ti or

‘ Targeted Radiotherapies ’ :ab,ti or ‘ Targeted Radiation Therapy ’ :ab,ti or ‘ Targeted Radiation Therapies ’ :ab,ti or

‘ Radiotherapy, Targeted ’ :ab,ti or ‘ Radiation Therapy, Targeted ’
